# Supplementary material for: Early Extubation is Associated with Improved Outcomes After Complete Surgical Repair of Pulmonary Atresia with Ventricular Septal Defect and Hypoplastic Pulmonary Arteries in Pediatric Patients
Source: Research Square preprint supplement (doi:10.21203/rs.3.rs-92125/v1), 2020-10-16
Supplement: Supplementary file 1 [file cb4bccedb5c3fb04907bf12c.docx]

Table 3 Blood product consumption

|  | Early extubation (n=14) | Matched controls (n=28) | *p* value |
| --- | --- | --- | --- |
| PRBCs (mL/kg) | 15.5 (0, 32.8) | 22.2 (8.1, 54.2) | 0.121 |
| Platelets (mL/kg) | 0 (0, 6.8) | 0 (0, 7.6) | 0.515 |
| FFP (mL/kg) | 0 (0, 12.2) | 12.9 (0, 29.6) | 0.041 |

NOTE. Non-normally distributed variables: medians with 25th to 75th percentile.

Abbreviations: FFP, fresh frozen plasma; PRBCs, packed red blood cells;
